# Supplementary material for: Ecosystem Services in the Context of Agroforestry—Results of a Survey among Agricultural Land Users in the Czech Republic
Source: MDPI journal article supplement (doi:10.3390/f14010030), 2022-12-23
Supplement: s1 [file s1]

Archive with 1 entries (1 files):
- forests-2066554-supplementary.pdf
