# Supplementary material for: Ecosystem Services in the Context of Agroforestry—Results of a Survey among Agricultural Land Users in the Czech Republic
Source: MDPI journal article supplement (doi:10.3390/f14010030), 2022-12-23
Supplement: s1 [file s1 › forests-2066554-supplementary.pdf]

# QUESTIONNAIRE

## Section 1: You and the tree species growing on your land

In this part of the questionnaire we would like to find out your attitude towards trees on agricultural land.

### 1.1 Which type of green do you prefer in terms of functional shape?

Linear - elongated shape, dominated by length versus width (borders, accompanying vegetation along watercourses)

Flat elements - flat, non-linear shape (draws, groves)

Solitaires - Individual trees, groups of trees

### 1.2 Which species composition of trees on agricultural land do you prefer in terms of functionality?

Coniferous trees

Deciduous tree species

Mixed

### 1.3 Do you have trees on your farm on agricultural land?

Yes    No

**If the answer was "YES", how many tree species grow on the land you manage?** (Please estimate and fill in how many trees are found on an average hectare of your land.)

---

---

**If the answer was "YES", please give the reason.** (you can tick more than one option)

Existing condition (trees are already there)

Increase biodiversity

I draw subsidies for the trees. \* (please fill in which ones) \_\_\_\_\_

I have to tolerate them for the sake of nature and landscape protection

I have to put up with them because of farming on leased land

I exploit tree species economically, I directly benefit from the wood, the fruits

Increase the fertility of agricultural production

I use them for agricultural side activities

Protect soils against erosion

I inherited the land as follows

For other reasons (please add)

---

---

**If the answer was "NO", please give the reason.** (you can tick more than one option)

Bureaucratisation of the process of introducing trees on agricultural land

Obstacle to cultivation

Competition in terms of resource profit (water, light)

Land ownership - inability to plant trees on leased land

Loss of subsidies for grassed area after planting

Long-term time horizon in terms of tree growth

They're not attractive to me

For other reasons (please add)

---

---

**1.4 What is the most important problem you see when planting trees on agricultural land?** (you can tick more than one option)

Obstacle to cultivation

Competition between crops

Land ownership - inability to plant trees on leased land

Bureaucratisation of the process of introducing trees on agricultural land

Loss of subsidies for grassed area after planting

Long time horizon in terms of tree growth

For other reasons (please add)

---

---

**1.5 Sly / Have you ever heard the term agroforestry?**

Yes    No

If the answer was "YES", please explain what you mean by this term

---

---

**1.6 If the answer was "YES", (you can tick more than one option):**

Would you set up an agroforestry system on your own land?

Would you set up an agroforestry system on rented land

I already manage in this system

I'm not interested in this way of farming

**1.7 Are you also a forest owner?**

Yes    No

**If the answer was "YES", please explain the reasons.**

Part of the heritage

For nature conservation reasons

Suitable form of investment

It's related to my professional focus

Source of firewood

For other reasons (please add)

---

---

**If the answer was "NO", please explain the reasons.**

I don't have enough money

At present, it is not profitable to own a forest

For nature conservation reasons

It means I have a legal obligation

Long time horizon in terms of tree growth

For other reasons (please add)

---

---

**1.8 What is your intention for the future in terms of management?**

I want to manage for the long term

I want to pass on to the next generation

I have the land as an investment

Other (please add) \_\_\_\_\_

---

## Section 2. Perception of the importance of trees in agricultural landscapes

**2.1 In your opinion, what is the importance of trees in agricultural landscapes for the provision of the following ecosystem services? (1 = low importance, 5 = high importance)? Mark an 'X' in each row.**

| <b>Ecosystem services</b>                                                                                   | <b>1</b> | <b>2</b> | <b>3</b> | <b>4</b> | <b>5</b> |
|-------------------------------------------------------------------------------------------------------------|----------|----------|----------|----------|----------|
| <b><i>Supply services</i></b>                                                                               |          |          |          |          |          |
| Groundwater recharge, provision of drinking water                                                           |          |          |          |          |          |
| Impact on increasing economic yield (increase in pasture, crop, livestock production)                       |          |          |          |          |          |
| Source of firewood                                                                                          |          |          |          |          |          |
| Source of wood and fibre for the timber industry                                                            |          |          |          |          |          |
| Source of medicines in the form of herbs, herbal supplements                                                |          |          |          |          |          |
| Food source, e.g.: fruits, nuts, mushrooms                                                                  |          |          |          |          |          |
| <b><i>Regulatory services</i></b>                                                                           |          |          |          |          |          |
| Ability to purify surface water                                                                             |          |          |          |          |          |
| Ability to reduce surface runoff                                                                            |          |          |          |          |          |
| Soil erosion reduction                                                                                      |          |          |          |          |          |
| Reducing flood risk or increasing the resilience of the landscape to drought                                |          |          |          |          |          |
| Reduction of pests and diseases in crops and livestock                                                      |          |          |          |          |          |
| Water retention in the landscape                                                                            |          |          |          |          |          |
| Ability to provide an odour screen, dust capture, noise protection,                                         |          |          |          |          |          |
| <b><i>Support services</i></b>                                                                              |          |          |          |          |          |
| Providing shelter for different species of animals                                                          |          |          |          |          |          |
| Maintaining the genetic diversity of the landscape                                                          |          |          |          |          |          |
| <b><i>Cultural services</i></b>                                                                             |          |          |          |          |          |
| Creating landscapes, providing scenery and scenic landscapes                                                |          |          |          |          |          |
| They represent traditional features of the historical landscape (legends, fairy tales, traditions, customs) |          |          |          |          |          |
| Leisure activities (sports, hunting, hiking, etc.)                                                          |          |          |          |          |          |

## Section 3. Windbreaks

Increasingly frequent weather extremes (droughts, extreme precipitation, sudden temperature changes, storms) are adversely affecting natural processes in the landscape. **Windbreaks** in particular can be one way of protecting against these adverse effects. These are linear plantings of trees and shrubs that work on the principle of filtering and breaking up the force of the wind, reducing the speed of air movement through the windbreak and reducing turbulence on the leeward side.

**3.1 In your opinion**, what is the importance of **windbreaks** in providing the following ecosystem services? (1 = low importance, 5 = high importance)? Mark an "X" in each row.

| Ecosystem services                                                                                          | 1 | 2 | 3 | 4 | 5 |
|-------------------------------------------------------------------------------------------------------------|---|---|---|---|---|
| <b>Supply services</b>                                                                                      |   |   |   |   |   |
| Groundwater recharge, provision of drinking water                                                           |   |   |   |   |   |
| Impact on increasing economic yield (increase in pasture, crop, livestock production)                       |   |   |   |   |   |
| Source of firewood                                                                                          |   |   |   |   |   |
| Source of wood and fibre for the timber industry                                                            |   |   |   |   |   |
| Source of medicines in the form of herbs, herbal supplements                                                |   |   |   |   |   |
| Food source, e.g.: fruits, nuts, mushrooms                                                                  |   |   |   |   |   |
| <b>Regulatory services</b>                                                                                  |   |   |   |   |   |
| Ability to purify surface water                                                                             |   |   |   |   |   |
| Ability to reduce surface runoff                                                                            |   |   |   |   |   |
| Soil erosion reduction                                                                                      |   |   |   |   |   |
| Reducing flood risk or increasing the resilience of the landscape to drought                                |   |   |   |   |   |
| Reduction of pests and diseases in crops and livestock                                                      |   |   |   |   |   |
| Water retention in the landscape                                                                            |   |   |   |   |   |
| Ability to provide an odour screen, dust capture, noise protection,                                         |   |   |   |   |   |
| <b>Support services</b>                                                                                     |   |   |   |   |   |
| Providing shelter for different species of animals                                                          |   |   |   |   |   |
| Maintaining the genetic diversity of the landscape                                                          |   |   |   |   |   |
| <b>Cultural services</b>                                                                                    |   |   |   |   |   |
| Creating landscapes, providing scenery and scenic landscapes                                                |   |   |   |   |   |
| They represent traditional features of the historical landscape (legends, fairy tales, traditions, customs) |   |   |   |   |   |
| Leisure activities (sports, hunting, hiking, etc.)                                                          |   |   |   |   |   |

## **Section 4. Final section**

### **4.1 In what mode do you mainly manage?**

ecological farming  
conventional farming

### **4.2 The size of the agricultural land you farm:**

10 ha  
11-50 ha  
51-100 ha  
101-500 ha  
501-2000 ha  
over 2001 ha

### **4.3 The amount of cultivated agricultural land in your ownership:**

10%  
11-30%  
31-50%  
51-70%  
71-90%  
91-99%  
100%

### **4.4 How long have you worked in the industry:**

less than 1 year 1-5 years 6-10 years 11-15 years more than 15 years

### **4.5 Your highest level of education:**

☐ primary ☐ secondary ☐ secondary - teaching certificate ☐ secondary - matriculation  
☐ Bachelor's degree  
☐ Master's

### **4.6 Is your field of education related to agricultural activities?**

☐ Yes ☐ No

### **4.7 Legal personality:**

Natural person  
Legal entity

### **4.8 In which region do you mainly farm?**

Central Bohemia  
Capital City of Prague  
Karlovy Vary  
Moravian-Silesian  
Ústecký  
Zlín

Liberec  
South Moravian  
Kralovehradecky  
Highlands  
Pardubice  
South Bohemia  
Olomouc  
Pilsen

**4.9 What is the size of your permanent residence**

up to 500  
501 - 1 000  
1 001 - 2000 inhabitants  
2 001 - 5 000 inhabitants  
5 001- 10 000 inhabitants  
10 001 - 100 000 inhabitants  
100 001 - 500 000 inhabitants  
over 500 001 inhabitants

**4.10 What is the average distance between your home and the farmland you farm?**  
(please fill in)

---

---

**4.11 What age category are you in:**

☐ up to 35 years old, ☐ 35 to 49 years old, ☐ 50 - 64 years, ☐ over 65 years

**4.12 Gender:**

man                      Woman                      I don't want to specify
